# Supplementary material
Source: publisher site journal article supplement (https://www.dovepress.com/get_supplementary_file.php?f=483638.docx)
Supplement: Supplementary file 1 [file get_supplementary_file.php]

**Supplementary Table1.**Univariate analysis of risk factors for hyperuricemia in obesity patients.

| Variables | Total | |  | Man | |  | Woman | | |  | |
| --- | --- | --- | --- | --- | --- | --- | --- | --- | --- | --- | --- |
| OR | 95% CI | P-value | OR | 95% CI | P-value | OR | 95% CI | | P-value | |
| Age(years) | 0.950 | 0.936-0.964 | <0.001** | 0.934 | 0.910-0.958 | <0.001** | 0.960 | 0.942-0.978 | <0.001** | |
| HR(beats/min) | 1.017 | 1.006-1.029 | 0.002** | 1.019 | 1.002-1.036 | 0.028** | 1.016 | 1.002-1.032 | 0.029** | |
| SP(mmHg) | 1.005 | 0.998-1.013 | 0.164 | 1.006 | 0.993-1.019 | 0.344 | 1.003 | 0.993-1.013 | 0.546 | |
| DP(mmHg) | 1.007 | 0.996-1.018 | 0.222 | 1.004 | 0.986-1.022 | 0.678 | 1.007 | 0.994-1.021 | 0.285 | |
| HbA1c(%) | 0.835 | 0.751-0.928 | 0.001** | 0.709 | 0.600-0.838 | <0.001** | 0.939 | 0.814-1.083 | 0.388 | |
| FPG(mmol/L) | 0.915 | 0.865-0.968 | 0.002** | 0.863 | 0.794-0.938 | 0.001** | 0.958 | 0.887-1.035 | 0.279 | |
| TC(mmol/L) | 1.208 | 1.057-1.380 | 0.005** | 1.263 | 1.021-1.563 | 0.032** | 1.158 | 0.976-1.374 | 0.093* | |
| TG(mmol/L) | 1.134 | 1.024-1.255 | 0.016** | 1.105 | 0.960-1.271 | 0.164 | 1.130 | 0.978-1.306 | 0.097* | |
| HDL(mmol/L) | 0.484 | 0.298-0.784 | 0.003** | 0.356 | 0.141-0.898 | 0.029** | .609 | 0.343-1.082 | 0.091* | |
| LDL(mmol/L) | 1.190 | 1.022-1.386 | 0.025** | 1.238 | 0.982-1.562 | 0.071* | 1.138 | 0.928-1.395 | 0.213 | |
| ABSI | 0.963 | 0.745-1.243 | 0.770 | 0.623 | 0.364-1.066 | 0.084* | 1.159 | 0.807-1.665 | 0.425 | |
| BAI | 1.072 | 1.039-1.106 | <0.001** | 1.061 | 1.009-1.115 | 0.021** | 1.078 | 1.030-1.129 | 0.001** | |
| AVI | 1.023 | 0.998-1.050 | 0.072* | 1.025 | 0.980-1.073 | 0.281 | 1.037 | 1.004-1.071 | 0.028** | |
| TyG index | 1.249 | 1.022-1.526 | 0.030** | 1.024 | 0.753-1.392 | 0.881 | 1.367 | 1.042-1.793 | 0.024** | |
| TyG-WHpR | 1.199 | 1.047-1.373 | 0.009** | 1.098 | 0.860-1.388 | 0.420 | 1.228 | 1.019-1.470 | 0.031** | |
| TyG-WHtR | 1.371 | 1.114-1.687 | 0.003** | 1.148 | 0.816-1.616 | 0.429 | 1.479 | 1.134-1.928 | 0.004** | |
| TyG-WC | 1.277 | 1.139-1.432 | <0.001** | 1.204 | 0.992-1.462 | 0.061* | 1.336 | 1.135-1.572 | <0.001** | |
| TyG-BMI | 1.010 | 1.006-1.014 | <0.001** | 1.008 | 1.002-1.014 | 0.007** | 1.010 | 1.005-1.015 | <0.001** | |
| TGtoHDL | 1.103 | 1.018-1.196 | 0.017** | 1.099 | 0.982-1.229 | 0.101 | 1.081 | 0.961-1.216 | 0.197 | |
| TCB index | 1.001 | 1.000-1.001 | 0.009** | 1.001 | 1.000-1.001 | 0.114 | 1.001 | 1.000-1.001 | 0.101 | |
| LAP | 1.003 | 1.001-1.005 | 0.005** | 1.003 | 1.000-1.006 | 0.077* | 1.003 | 1.000-1.006 | 0.043** | |

* P<0.1, ** P<0.05
